# Supplementary material
Source: PubMed Central journal article supplement (PMC10874253)
Supplement: NIHMS1965294-supplement-1.pdf [file NIHMS1965294-supplement-1.pdf]

## **Supplementary Figures**

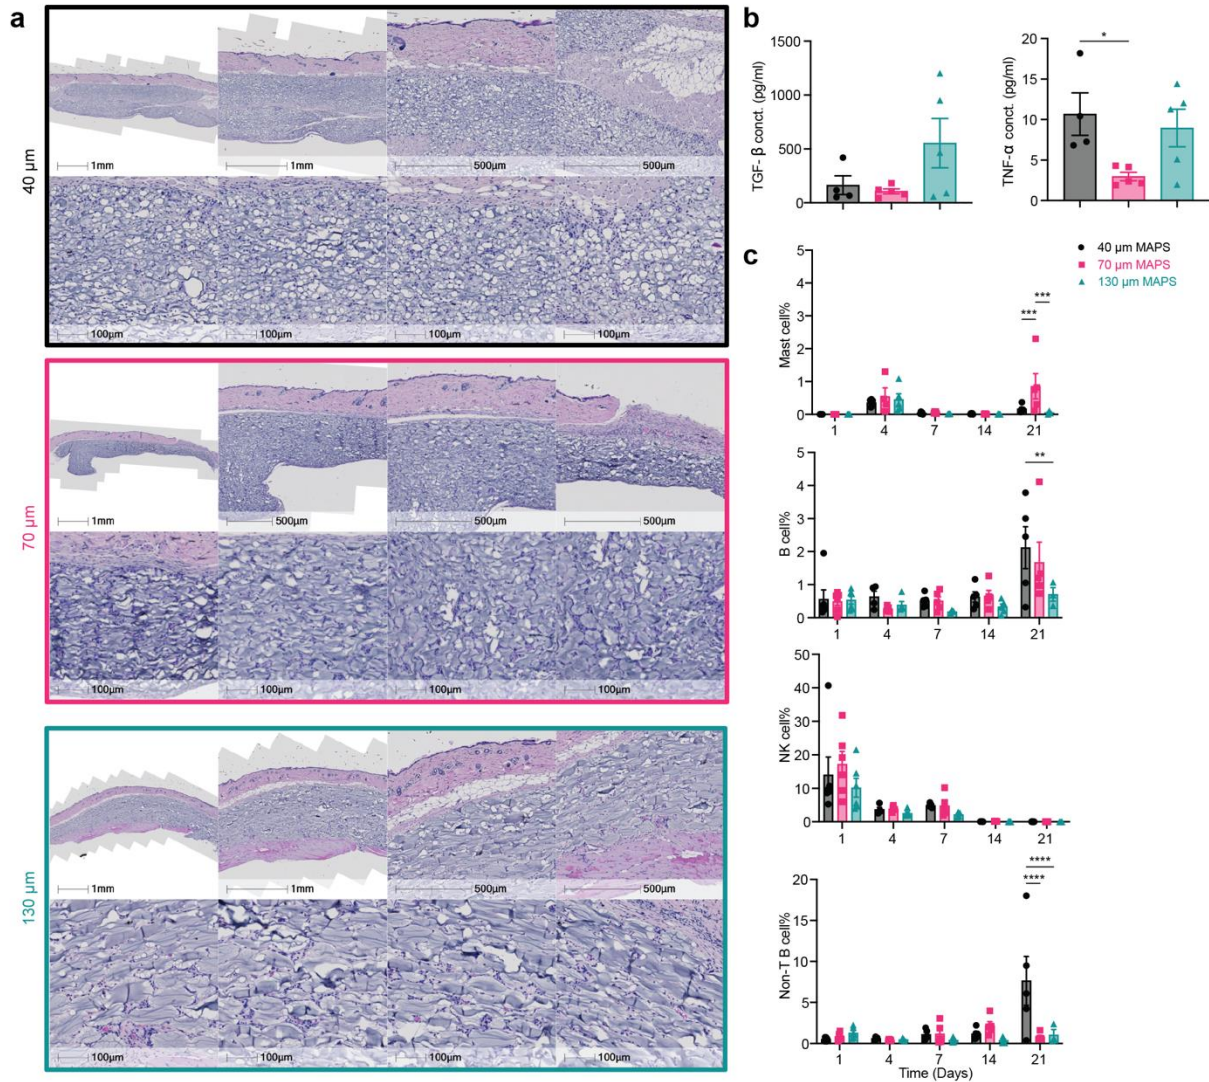

**Figure S1.** 40  $\mu\text{m}$ , 70  $\mu\text{m}$ , and 130  $\mu\text{m}$  MAP scaffolds showed a difference in immune cell recruitment and FBR in the subcutaneous implantation model. a, representative pictures of Hematoxylin and eosin (H&E) staining on day 21. The top row in each panel from left to right showed pictures with objectives of 1x and 2x (implant overview, scale bar, 1 mm), 5x (skin/dorsal interface, scale bar, 500  $\mu\text{m}$ ), 5x (capsule/ventral interface, scale bar, 500  $\mu\text{m}$ ). The bottom row in each panel showed representative pictures inside the implant with objectives of 10x. b, ELISA results of selected cytokine concentrations inside the hydrogel implants. c, mast cell, B cell, NK cell, non-T/B cell percentages among all CD45+ live cells from flow cytometry. Statistical analysis: two-way ANOVA with Šídák's multiple comparisons test made between treatment groups only when there was a significance in the interaction term of treatment type x time. \*  $p < 0.05$ , \*\*  $p < 0.001$ , \*\*\*  $p < 0.001$ , \*\*\*\*  $p < 0.0001$ . Error bars, mean  $\pm$  s.e.m.,  $n = 5$  mice per group with some data points removed due to experimental reasons.

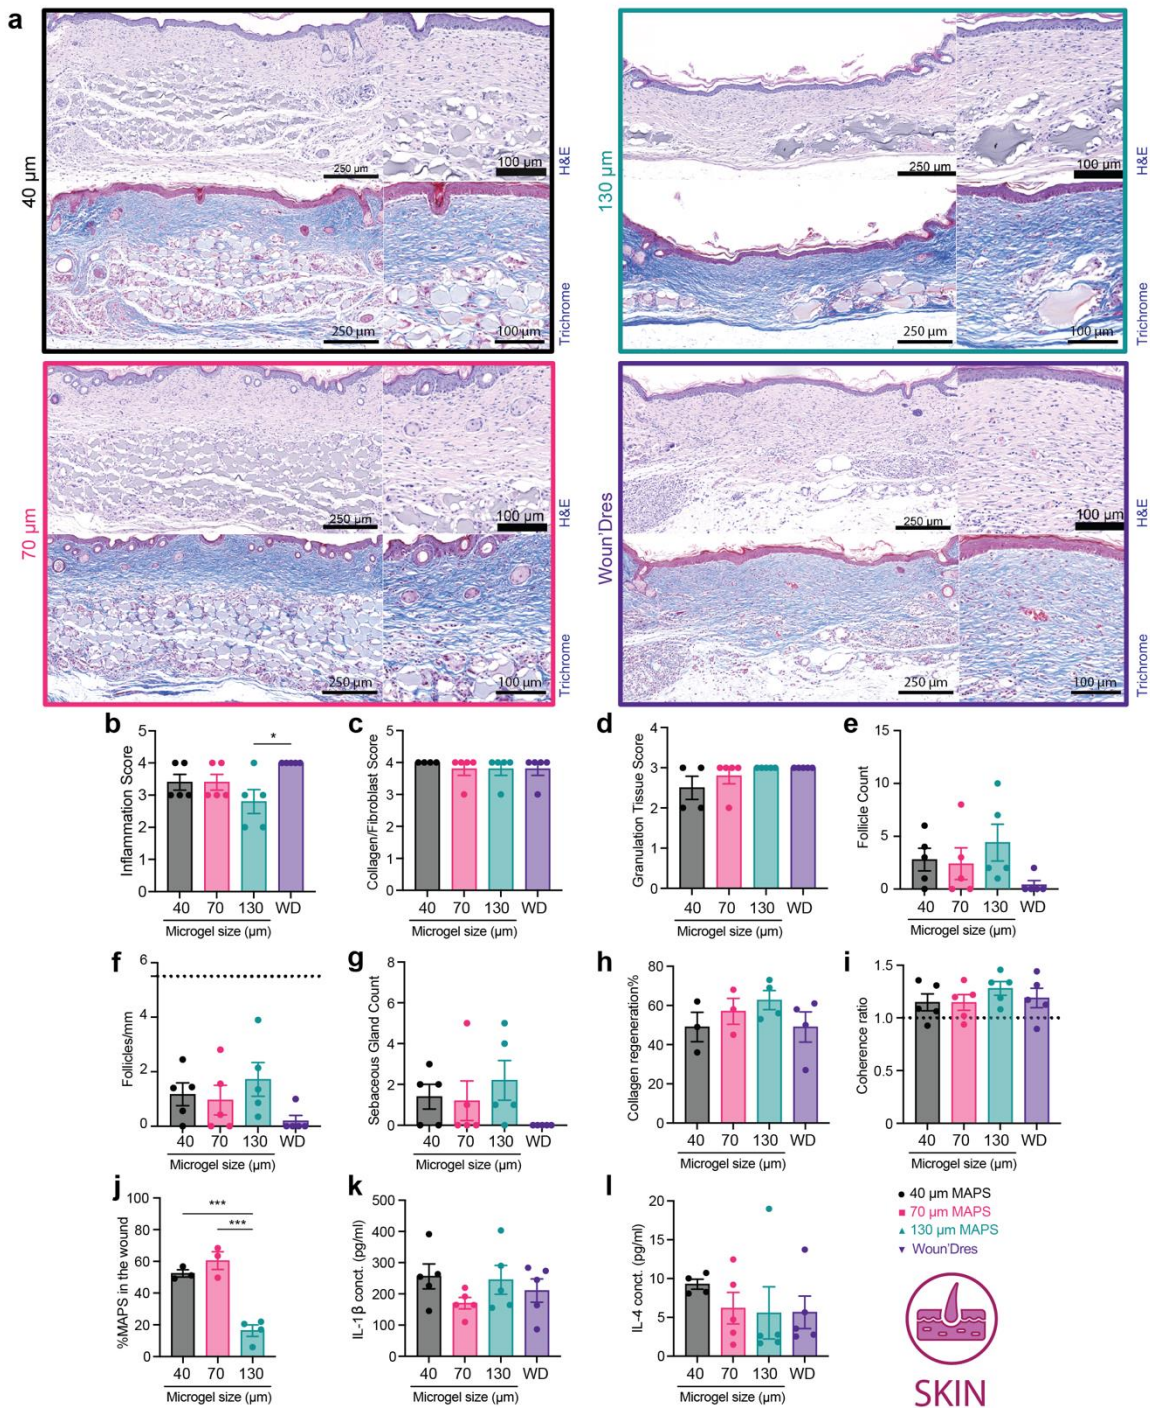

**Figure S2.** 130  $\mu\text{m}$  MAP scaffolds induced mature collagen regeneration and reduced inflammation level in the skin wound. a, representative pictures of 21-day skin wound samples with H&E staining and Masson's trichrome staining (left panel, full wound and surrounding skin, scale bar, 250  $\mu\text{m}$ ; right panel, zoom-in picture at the wound site, scale bar, 100  $\mu\text{m}$ ). b-d, histologic assessment of inflammation, collagen/fibroblast score and granulation tissue. e, the cell nucleus area in the connective tissue. The dotted line and the grey area stand for the average number and the range for normal skin. f, the cell nucleus area in the remaining biomaterials. The

dotted line and the grey area stand for the average number and the range for normal skin. g-i, histologic quantification of follicle count, follicles/mm, and sebaceous gland count. The gray line stands for the value in normal skin. j, collagen regeneration percentage compared to the normal skin. k, the coherence ratio in collagen fibers. The dotted line stands for the level of normal skin. l, the remaining MAP scaffolds amount in the wound relative to the size of the wound. m-n, ELISA results of IL-1- $\beta$  and IL-4 concentrations in the MAP-treated wounds on day 21. Statistical analysis: two-way ANOVA with Šídák's multiple comparisons test made between treatment groups only when there was a significance in the interaction term of treatment type x time. Dunnet method was used to compare each treatment against normal skin baseline (gray pond). \*/#  $p < 0.05$ , \*\*  $p < 0.001$ , \*\*\*  $p < 0.001$ , \*\*\*\*  $p < 0.0001$ . Error bars, mean  $\pm$  s.e.m.,  $n = 5$  mice per group with some data points removed due to experimental reasons.

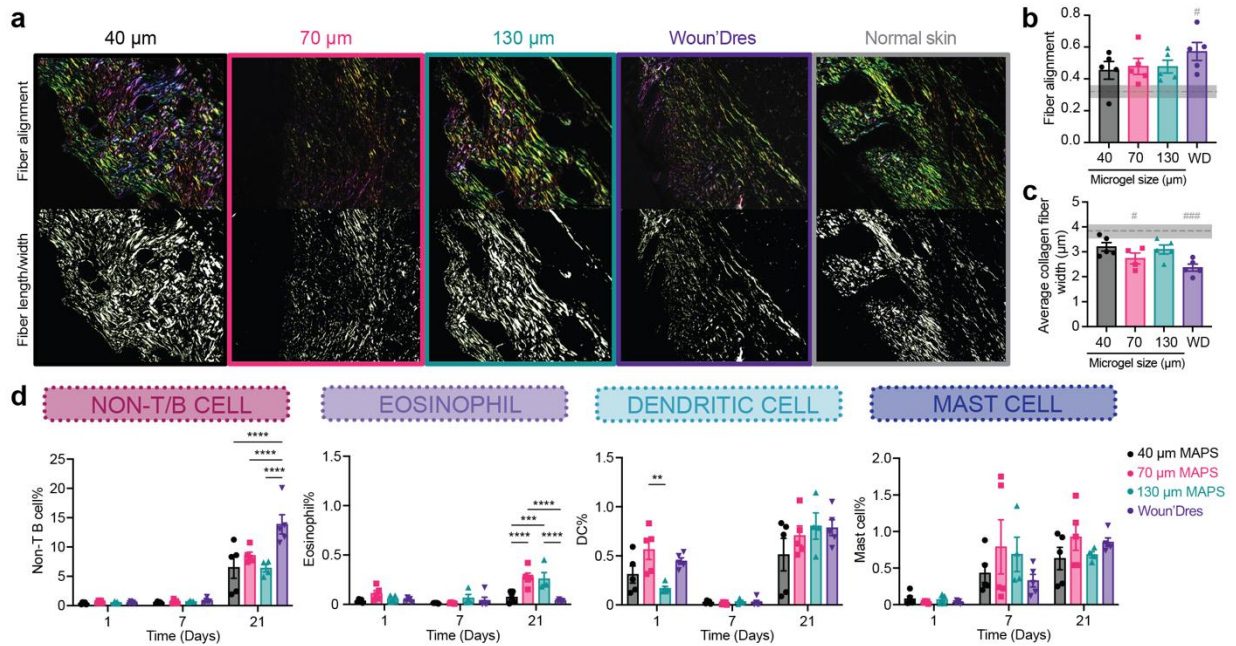

**Figure S3.** 130  $\mu\text{m}$  MAP scaffolds induced mature collagen regeneration, and immune cell recruitment followed a size-dependent manner in the skin wound. a, representative pictures of 21-day skin wound samples with Picro-Sirius Red staining (top row, fiber alignment analysis; bottom row, fiber length/width analysis). b, fiber alignment score (calculated by ImageJ software) in the regions of interest. The dotted line and the grey area stand for the average number and the range for normal skin. c, average width of collagen fibers in the regions of interest. The dotted line and the grey area stand for the average number and the range for normal skin. d, non-T/B cell, eosinophil, dendritic cell, mast cell percentages among all CD45+ live cells from flow cytometry. Statistical analysis: two-way ANOVA with Šídák's multiple comparisons test made between 40  $\mu\text{m}$ , 70  $\mu\text{m}$ , and 130  $\mu\text{m}$  MAP scaffolds and wound dressing groups only when there was a significance in the interaction term of scaffold type x time. \*\*  $p < 0.01$ , \*\*\*  $p < 0.001$ , \*\*\*\*  $p < 0.0001$ . Error bars, mean  $\pm$  s.e.m.,  $n = 5$  mice per group.

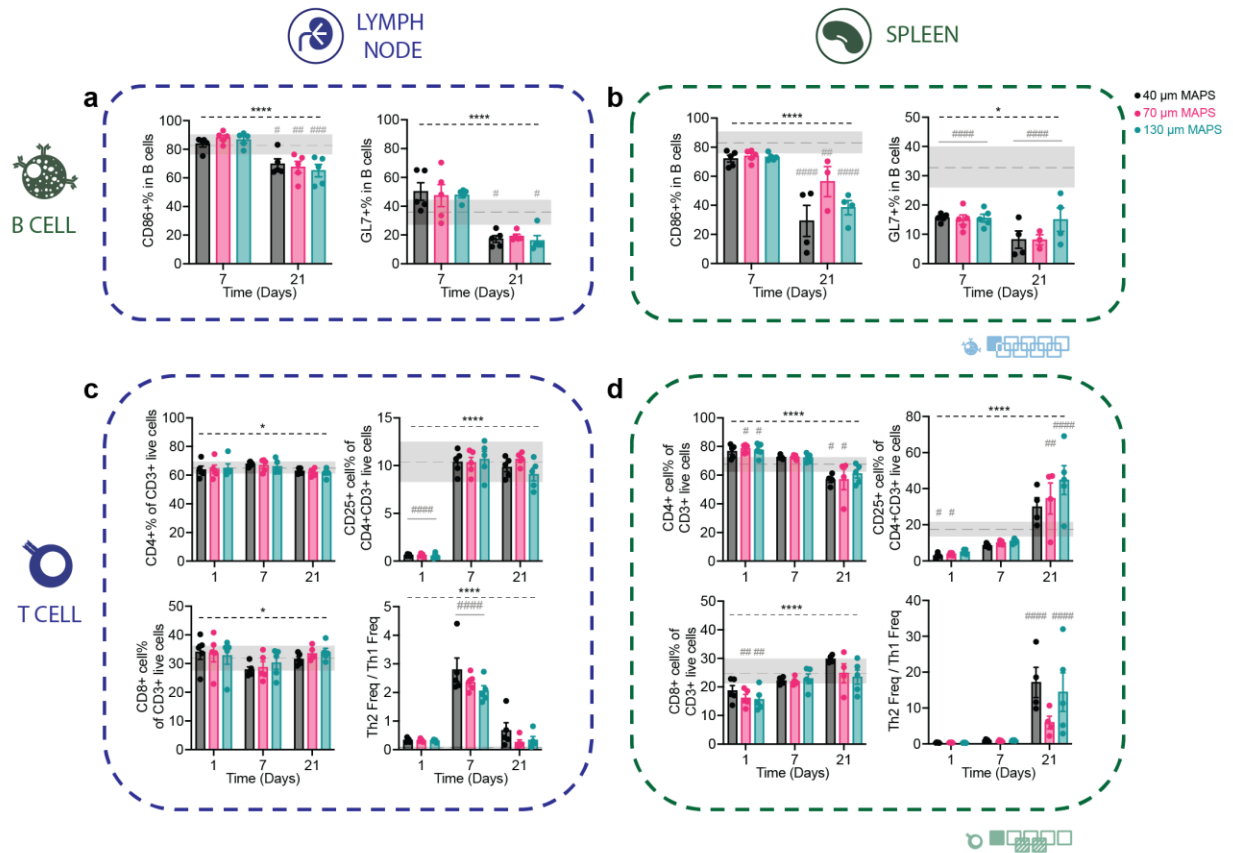

**Figure S4.** MAP scaffolds treatment induced phenotype switches in both B cell and T cell populations compared to baseline in draining lymph nodes and spleen of mice. a and b, B cell profiles in draining lymph nodes and spleen of mice treated with 40 μm, 70 μm, and 130 μm MAP scaffolds across 3 time points. c and d, T cell profiles in draining lymph nodes and spleen of mice treated with 40 μm, 70 μm, and 130 μm MAP scaffolds across 3 time points. Statistical analysis: two-way ANOVA with Šidák's multiple comparisons test made between 40 μm, 70 μm, and 130 μm MAP scaffolds groups only when there was a significance in the interaction term of scaffold type x time. After a two-way ANOVA, Dunnet method was used to compare the experiment groups with the baseline control group (mice without wounding). \*/# p<0.05, \*\*/## p<0.01, \*\*\*/### p<0.001, \*\*\*\*/#### p<0.0001. Asterisks with solid line stand for comparisons between MAP scaffolds. Asterisks with dash line stand for significant difference in time. Error bars, mean ± s.e.m., n = 5 mice per group but with some data points removed due to experimental reasons. The blue symbol beneath panel b stands for the 9-color B panel used in panel a, b of this figure. The green symbol beneath panel d stands for the 7-color T cell panel used in panel c, d of this figure.

**INNATE PANEL**

- (1) Cells (Singlets)
- (2) Live cells
  - Zombie NIR/Viability
- (3) CD45+ cells
  - CD45
  - AF647/MAP scaffold
- (4) Ly6G+/- cells
  - Ly6G/Neutrophil marker
- (5) CD11b+CD11c+/- cells
  - CD11b
  - CD11c
- (6) FceR1+ cells
  - FceR1
- (6) FceR1- cells
- (7) MHCII- SSC low cells
  - CD64
- (8) CD64-CD11b+ Monocytes
  - Ly6C
- (9) Ly6C+ iMonocytes
- (9) Ly6C- rMonocytes
- (7) Other MHCII+/- cells
  - CD24
- (10) CD64+ Macrophages
  - Arg1
  - iNOS
- (10) CD64-CD24+
- (11) CD11b+MHCII+ CD11b+DCs
- (11) CD11b-MHCII+ CD11b-DCs
- (11) CD11b+MHCII- Eosinophils
- (5) CD11b-CD11c- cells
- (12) FceR1+ cells
  - (13) FceR1+ cells
    - CD117
  - (14) CD45+CD117+ Mast cells
  - (14) CD45-CD117- Basophils
- (12) FceR1-CD11b low NK cells
- (12) FceR1-CD11b- cells
  - (15) CD24+MHCII+ B cells
  - (15) CD24-MHCII- T cells
  - (15) CD24+MHCII- cells

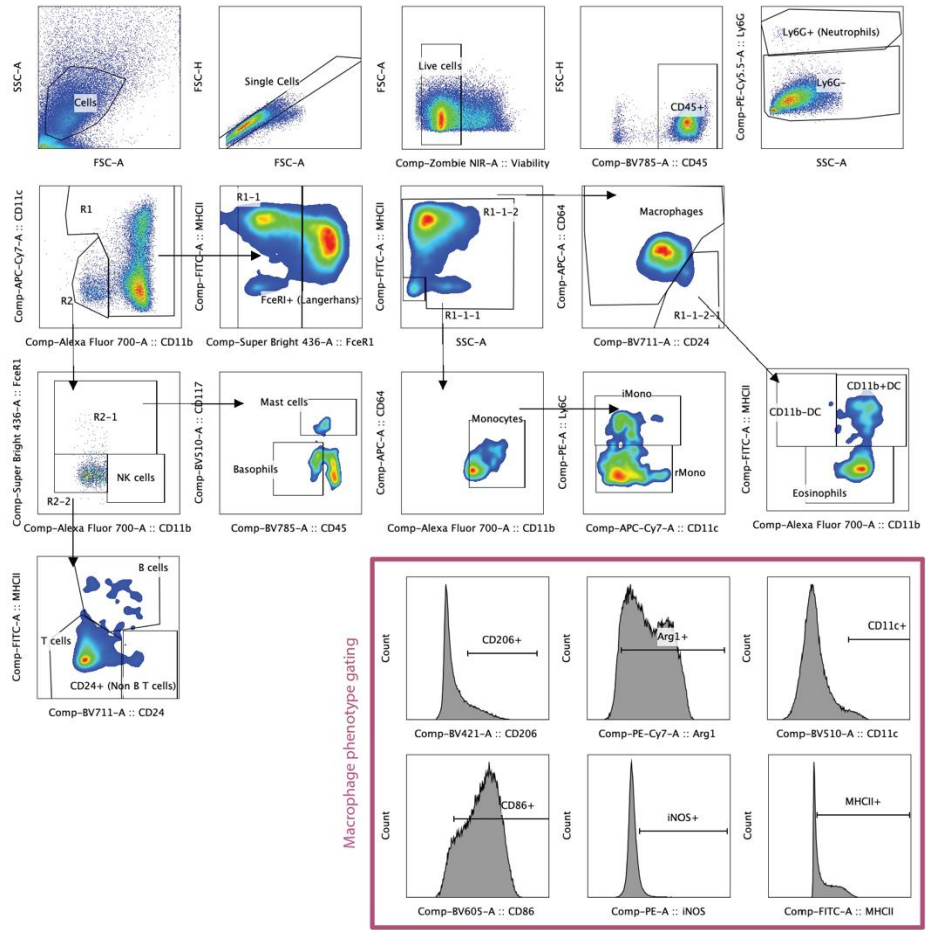

**Figure S5.** Gating strategy for flow cytometry analysis on myeloid cells with 13 markers.

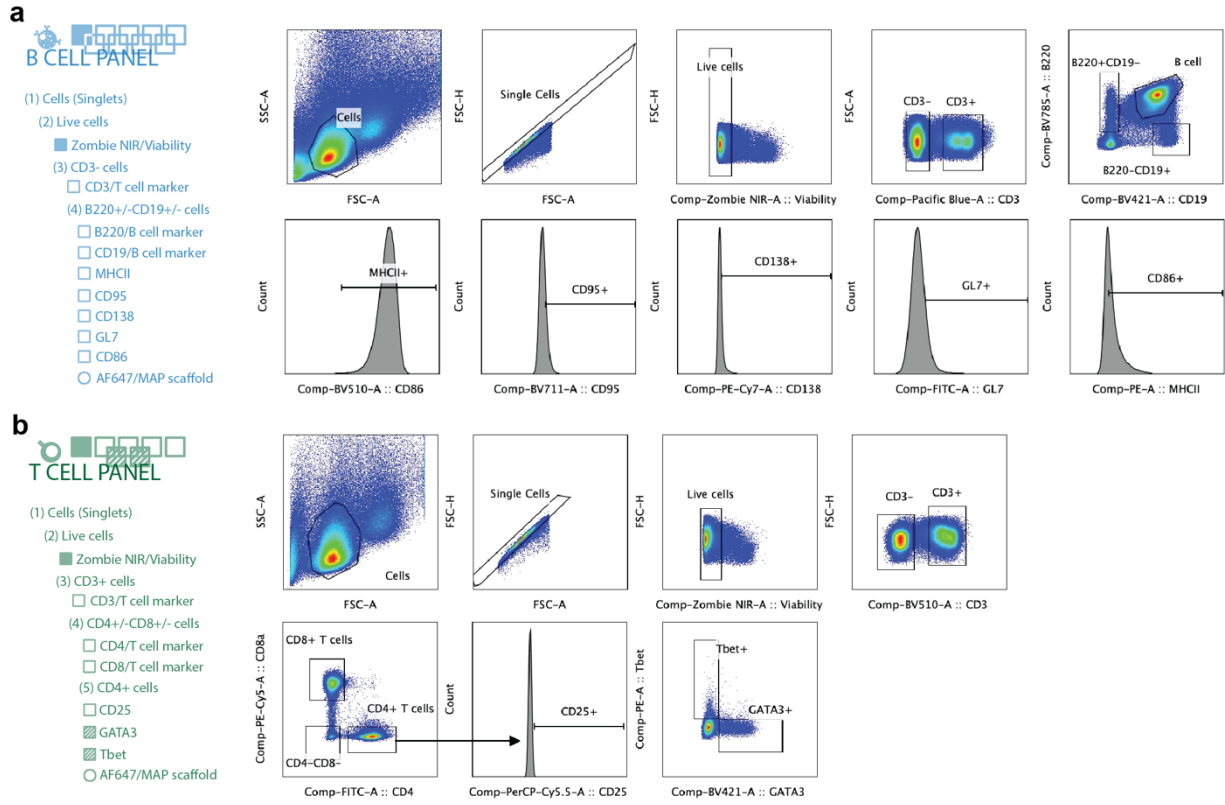

**Figure S6.** Gating strategy for flow cytometry analysis on: a) B cells with 9 markers. b) T cells with 7 markers.

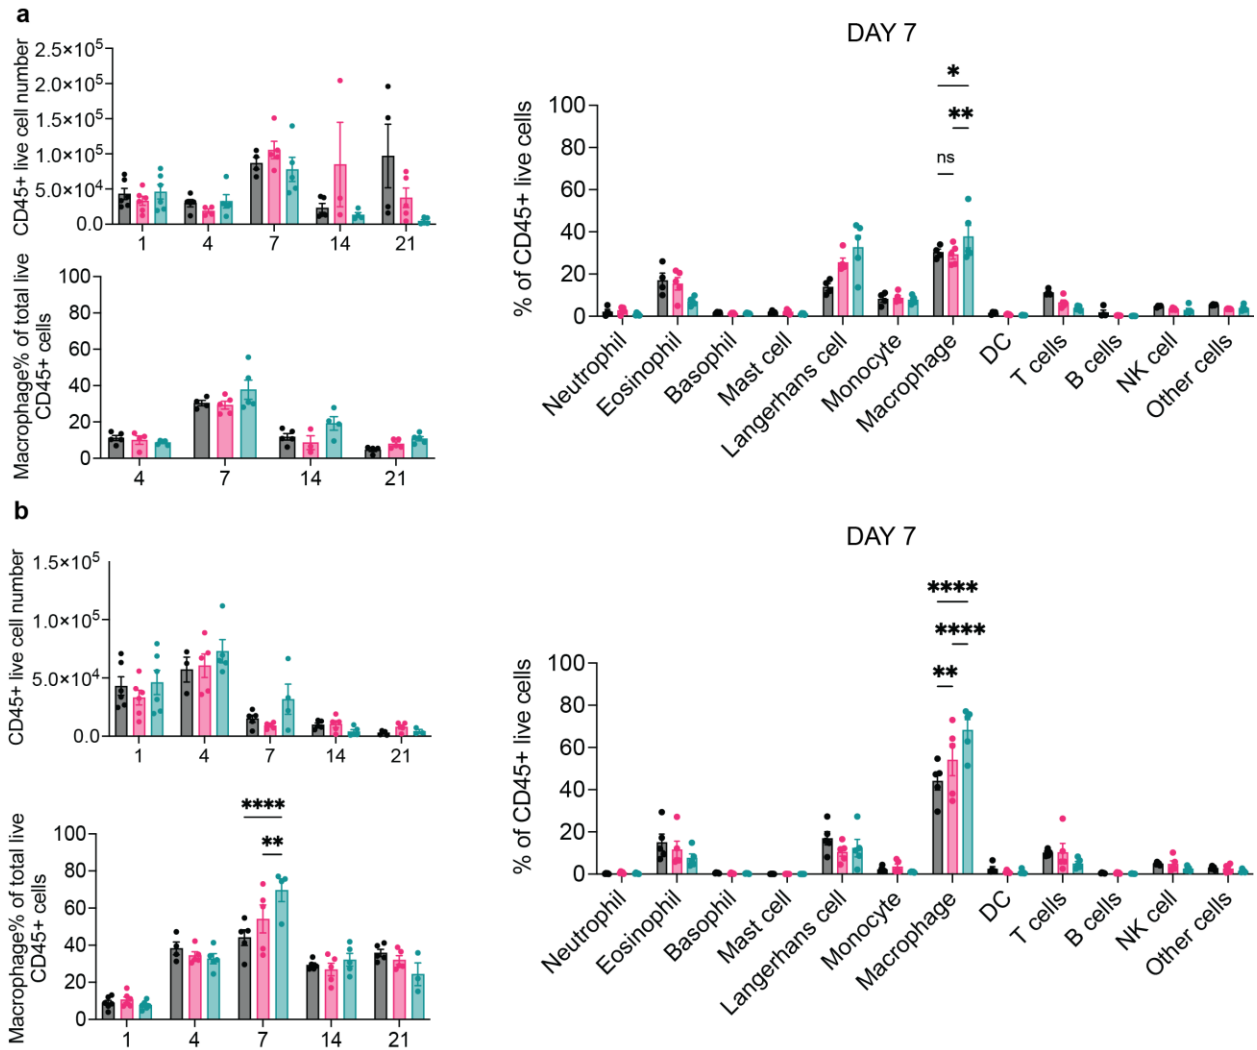

**Figure S7.** Immune cell recruitment and response followed a size-dependent manner in Subcutaneous model on independent experiments across time. A) Additional experiment B) Experiment use in the manuscript. Total number of live immune cells (Zombie NIR- CD45+), macrophages across five time points and myeloid cell abundance at day 7 for 40  $\mu\text{m}$ , 70  $\mu\text{m}$ , and 130  $\mu\text{m}$  MAP scaffolds. Statistical analysis: two-way ANOVA with Šídák's multiple comparisons test made between 40  $\mu\text{m}$ , 70  $\mu\text{m}$ , and 130  $\mu\text{m}$  MAP scaffolds and wound dressing groups only when there was a significance in the interaction term of scaffold type x time. \*  $p < 0.05$ , \*\*  $p < 0.01$ , \*\*\*  $p < 0.001$ , \*\*\*\*  $p < 0.0001$ . Error bars, mean  $\pm$  s.e.m.,  $n = 5$  mice per group.

**Table S1.** Scoring of Histological Sections for Total Wound Healing

| Score | Criteria                                                                                                                                                                                                                     |
|-------|------------------------------------------------------------------------------------------------------------------------------------------------------------------------------------------------------------------------------|
| 1-3   | None to minimal cell accumulation. No granulation tissue or epithelial travel.                                                                                                                                               |
| 4-6   | Thin, immature granulation that is dominated by inflammatory cells but has few fibroblasts, capillaries, or collagen deposition. Minimal epithelial migration.                                                               |
| 7-9   | Moderately thick granulation tissue can range from being dominated by inflammatory cells to more fibroblasts and collagen deposition. Extensive neovascularization. Epithelium can range from minimal to moderate migration. |



10-12 Thick, vascular granulation tissue dominated by fibroblasts and extensive collagen deposition. Epithelium partially to completely covering the wound.

**Table S2.** Scoring of Epidermis/re-epithelialization

| Score | Criteria                                                          |
|-------|-------------------------------------------------------------------|
| 0     | No migration.                                                     |
| 1     | Minimal re-epithelialization (<10%).                              |
| 2     | Partial re-epithelialization (incomplete closure).                |
| 3     | Complete re-epithelialization without keratin layer formation.    |
| 4     | Complete/thick re-epithelialization with keratin layer formation. |

**Table S3.** Scoring of Granulation Tissue/Vascularization

| Score | Criteria                                                      |
|-------|---------------------------------------------------------------|
| 0     | No granulation tissue.                                        |
| 1     | Early granulation tissue, no vascularization.                 |
| 2     | Mature granulation tissue, early vascularization.             |
| 3     | Mature granulation tissue with mature blood vessel formation. |

**Table S4.** Scoring of Collagen Deposition/Fibroplasia

| Score | Criteria                                                                                                     |
|-------|--------------------------------------------------------------------------------------------------------------|
| 0     | No collagen deposition/fibroplasia.                                                                          |
| 1     | Fibroblast proliferation/no collagen deposition.                                                             |
| 2     | Fibroblast proliferation with minimal collagen deposition.                                                   |
| 3     | Fibroblast proliferation with extensive haphazard collagen deposition.                                       |
| 4     | Extensive organized collagen deposition or complete replacement of dermis with fibrous tissue (mature scar). |

**Table S5.** Scoring of Inflammation

| Score | Criteria                                                                     |
|-------|------------------------------------------------------------------------------|
| 0     | No inflammatory cells.                                                       |
| 1     | 1-50 leukocytes per high power field.                                        |
| 2     | 51-100 leukocytes per high power field.                                      |
| 3     | 101-250 leukocytes per high power field.                                     |
| 4     | >250 leukocytes per high power field or microabscesses or abscesses present. |

**Table S6.** A list of antibodies for the innate panel

| Marker | Clone       | Fluorophore | Supplier          | Cat. #     | Titration (tissue/cell type) |
|--------|-------------|-------------|-------------------|------------|------------------------------|
| FCeR1  | MAR-1       | PB          | BioLegend         | 134314     | 2 in 100 (Splenocyte)        |
| CD117  | ACK2        | PE          | BioLegend         | 135105     | 1.25 in 100 (Splenocyte)     |
| CD45   | 30-F11      | BV785       | BioLegend         | 103149     | 0.625 in 100 (Implant)       |
| CD24   | M1/69       | BV711       | BD<br>Biosciences | 563450     | 0.25 in 100 (Implant)        |
| Ly6C   | HK1.4       | BV510       | BioLegend         | 128033     | 1.25 in 100 (Splenocyte)     |
| MHCII  | M5/114.15.2 | SB600       | eBioscience       | 63-5321-82 | 0.5 in 100 (Splenocyte)      |

|       |           |                    |             |            |                               |
|-------|-----------|--------------------|-------------|------------|-------------------------------|
| Ly6G  | 1A8       | PE-Cy5             | eBioscience | 15-9668-82 | 0.3125 in 100 (Implant)       |
| CD64  | X54-5/7.1 | PE-Cy7             | BioLegend   | 139313     | 0.625 in 100 (Implant)        |
| CD11b | M1/70     | Alexa Fluor<br>700 | eBioscience | 56-0112-80 | 0.0625 in 100 (Implant)       |
| CD11c | N418      | APC-Cy7            | BioLegend   | 117323     | 0.039 in 100 (Implant)        |
|       |           | Zombie NIR         | BioLegend   | 423105     | 0.0625 in 100<br>(Splenocyte) |

**Table S7.** A list of antibodies for the macrophage panel

| Marker    | Clone       | Fluorophore        | Supplier    | Cat. #     | Titration (cell type)         |
|-----------|-------------|--------------------|-------------|------------|-------------------------------|
| CD206     | C068C2      | BV421              | BioLegend   | 141717     | 2 in 100 (Macrophage)         |
| CD11c     | N418        | BV510              | BioLegend   | 117338     | 1.25 in 100<br>(Macrophage)   |
| MHCII     | M5/114.15.2 | FITC               | eBioscience | 11-5321-82 | 0.25 in 100<br>(Macrophage)   |
| iNOS      | CXNFT       | PE                 | eBioscience | 12-5920-80 | 1.5 in 100 (Macrophage)       |
| F4/80     | BM8         | PerCP-Cy5.5        | eBioscience | 45-4801-80 | 0.5 in 100 (Macrophage)       |
| CD86      | GL-1        | BV605              | BioLegend   | 105037     | 0.156 in 100<br>(Macrophage)  |
| Arg1      | AlexF5      | PE-CY7             | eBioscience | 17-3697-80 | 1.5 in 100 (Macrophage)       |
| CD11b     | M1/70       | Alexa Fluor<br>700 | eBioscience | 56-0112-80 | 0.25 in 100<br>(Macrophage)   |
| Viability |             | Zombie NIR         | BioLegend   | 423105     | 0.0625 in 100<br>(Macrophage) |

**Table S8.** A list of antibodies for the B cell panel

| Marker    | Clone       | Fluorophore | Supplier          | Cat. # | Titration (cell type)         |
|-----------|-------------|-------------|-------------------|--------|-------------------------------|
| CD3       | 17A2        | PB          | BioLegend         | 100214 | 0.25 in 100 (Splenocyte)      |
| GL7       | GL7 (RUO)   | FITC        | BD<br>Pharmingen  | 553666 | 1 in 100 (Splenocyte)         |
| CD95      | Jo2 (RUO)   | BV711       | BD<br>Biosciences | 740716 | 1 in 100 (Splenocyte)         |
| B220      | RA3-6B2     | BV785       | BioLegend         | 103226 | 0.0625 in 100<br>(Splenocyte) |
| CD19      | 1D3         | BV421       | BioLegend         | 115537 | 0.3125 in 100<br>(Splenocyte) |
| MHCII     | M5/114.15.2 | BV510       | BioLegend         | 107608 | 0.125 in 100 (Splenocyte)     |
| CD138     | 281-2       | PE-Cy7      | BioLegend         | 142513 | 1 in 100 (Splenocyte)         |
| CD86      | GL-1        | PE          | BioLegend         | 105040 | 0.625 in 100<br>(Macrophage)  |
| Viability |             | Zombie NIR  | BioLegend         | 423105 | 0.0625 in 100<br>(Splenocyte) |

**Table S9.** A list of antibodies for the T cell panel

| Marker    | Clone    | Fluorophore | Supplier         | Cat. # | Titration (cell type)         |
|-----------|----------|-------------|------------------|--------|-------------------------------|
| CD3       | 17A2     | BV510       | BioLegend        | 100233 | 1.25 in 100 (Splenocyte)      |
| CD4       | GK1.5    | FITC        | BD<br>Pharmingen | 557307 | 0.156 in 100 (Splenocyte)     |
| CD8a      | 53-6-7   | PE-Cy5.5    | BioLegend        | 100710 | 0.1 in 100 (Splenocyte)       |
| CD25      | PC61     | PerCP-Cy5.5 | BioLegend        | 102030 | 0.5 in 100 (Splenocyte)       |
| Tbet      | 4B10     | PE          | BioLegend        | 644810 | 2.5 in 100 (Splenocyte)       |
| GATA3     | 16E10A23 | BV421       | BioLegend        | 653806 | 2.5 in 100 (Splenocyte)       |
| Viability |          | Zombie NIR  | BioLegend        | 423105 | 0.0625 in 100<br>(Splenocyte) |

**Table S10.** A list of antibodies for the APC panel

| Marker | Clone     | Fluorophore          | Supplier         | Cat. #      | Titration (cell type)         |
|--------|-----------|----------------------|------------------|-------------|-------------------------------|
| CD3    | 17A2      | NovaFluor Red<br>685 | Thermo<br>Fisher | M002T02R02  | 0.0625 in 100<br>(Splenocyte) |
| CD45   | 30-F11    | Alexa Fluor 532      | Thermo<br>Fisher | 58-0451-82  | 0.3125 in 100<br>(Splenocyte) |
| XCR1   | ZET       | APC-Cy7              | BioLegend        | 148223      | 0.3125 in 100<br>(Splenocyte) |
| CD64   | X54-5/7.1 | BV711                | BioLegend        | 139311      | 0.156 in 100 (Splenocyte)     |
| Ly6C   | HK1.4     | BV570                | BioLegend        | 128030      | 0.625 in 100 (Splenocyte)     |
| CD169  | 3D6.112   | PE-Cy7               | BioLegend        | 142412      | 2.5 in 100 (Splenocyte)       |
| F4/80  | BM8       | PB                   | Thermo<br>Fisher | MF48028     | 2 in 100 (Splenocyte)         |
| CD80   | 16-10A1   | PE-CF594             | BioLegend        | 104737      | 1.25 in 100 (Splenocyte)      |
| CD103  | M290      | VioBright515         | Miltenyi         | 130-111-609 | 2 in 100 (Splenocyte)         |
| CD24   | M1/69     | SB600                | Thermo<br>Fisher | 63-0242-80  | 0.625 in 100 (Splenocyte)     |
| CD11c  | N418      | SB780                | Thermo<br>Fisher | 78-0114-82  | 0.625 in 100 (Splenocyte)     |
| pDCA-1 | 927       | BV650                | BioLegend        | 127019      | 0.078 in 100 (Splenocyte)     |
| ICAM-1 | 3E2       | SB436                | Thermo<br>Fisher | 62-0542-80  | 0.625 in 100 (Splenocyte)     |
| CCR7   | 4B12      | PE                   | Thermo<br>Fisher | 12-1971-80  | 1.25 in 100 (Splenocyte)      |
| B220   | RA3-6B2   | APC/Fire810          | BioLegend        | 103277      | 0.3125 in 100<br>(Splenocyte) |
| CD172a | P84       | BB700                | BD<br>Bioscience | 742205      | 1 in 100 (Splenocyte)         |
| MHCII  | M5/114    | BV510                | BioLegend        | 107635      | 0.25 in 100 (Splenocyte)      |
| Ly6G   | 1A8       | BV480                | BD<br>Bioscience | 746448      | 0.125 in 100 (Splenocyte)     |
| CD11b  | M1/70     | Alexa Fluor 700      | eBioscience      | 56-0112-80  | 0.0625 in 100<br>(Splenocyte) |

Viability

Zombie NIR

BioLegend

423105

0.03125 in 100  
(Splenocyte)

---

**Table S11.** Fluorescence minus one (FMO) controls for the macrophage panel

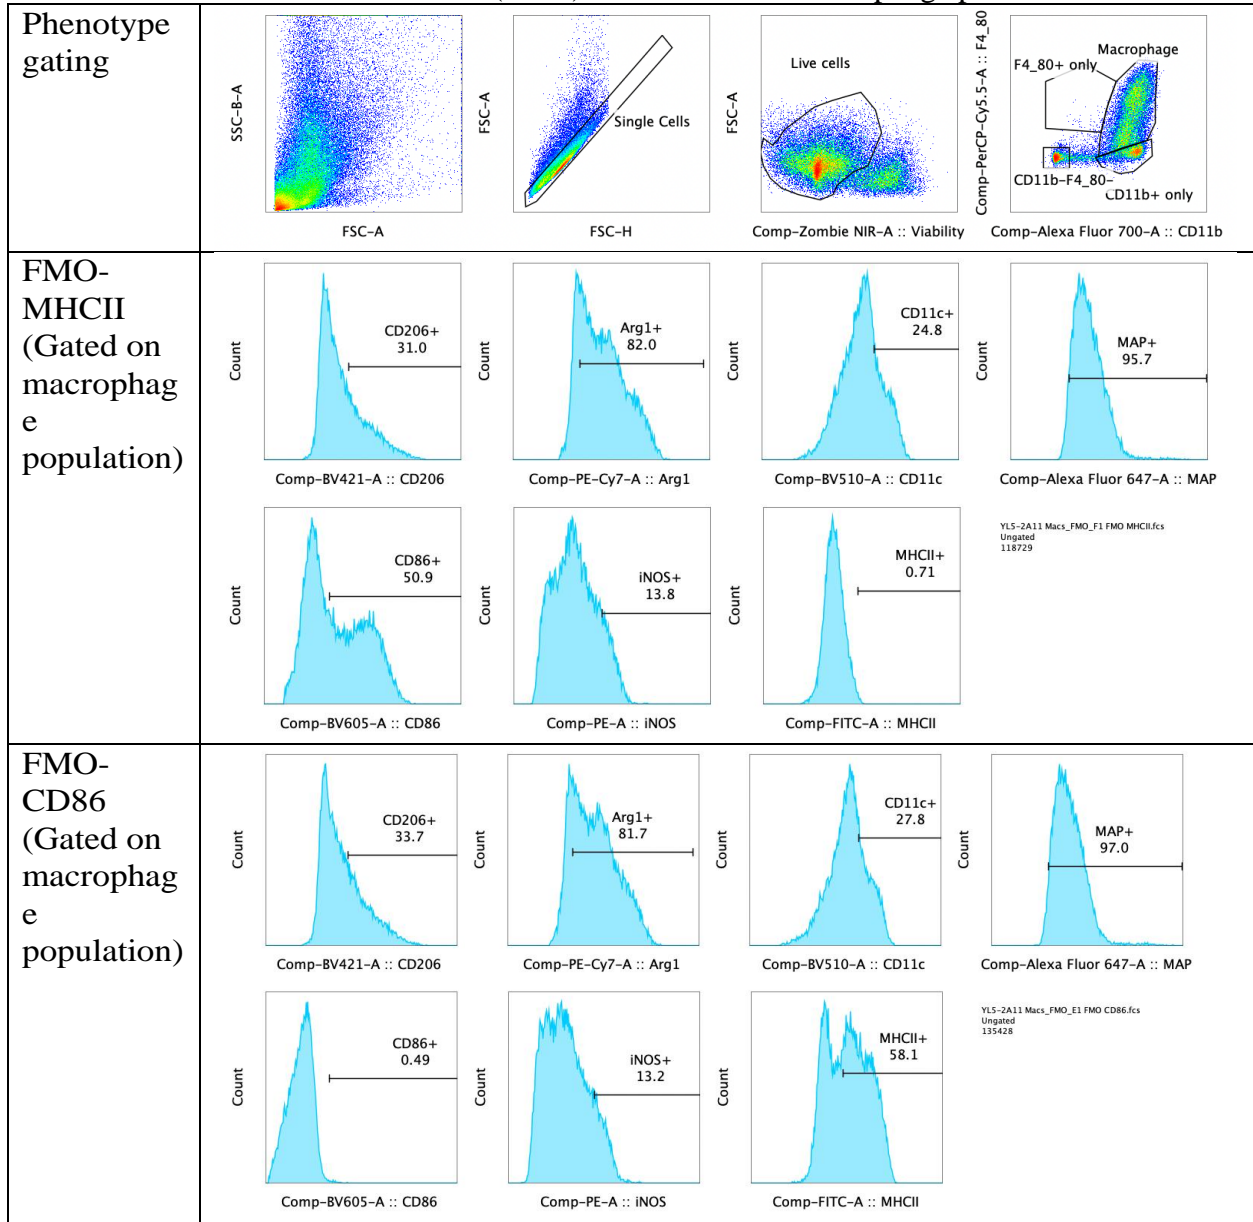

**FMO-iNOS  
(Gated on macrophage population)**

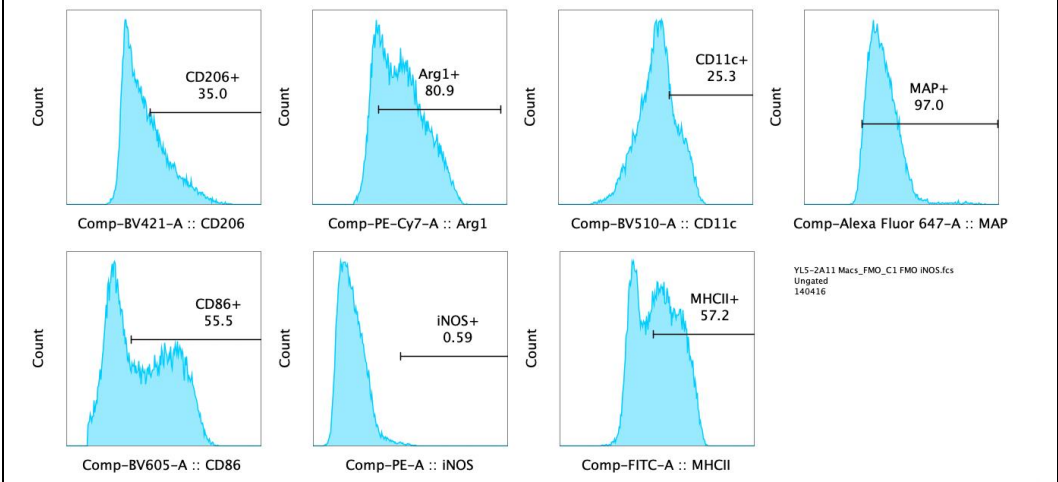

**FMO-CD11c  
(Gated on macrophage population)**

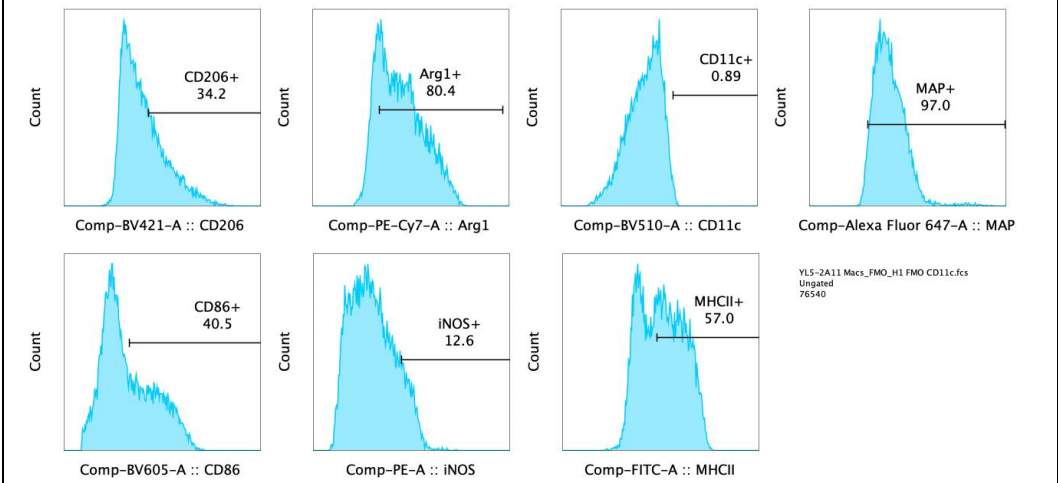

**FMO-CD206  
(Gated on macrophage population)**

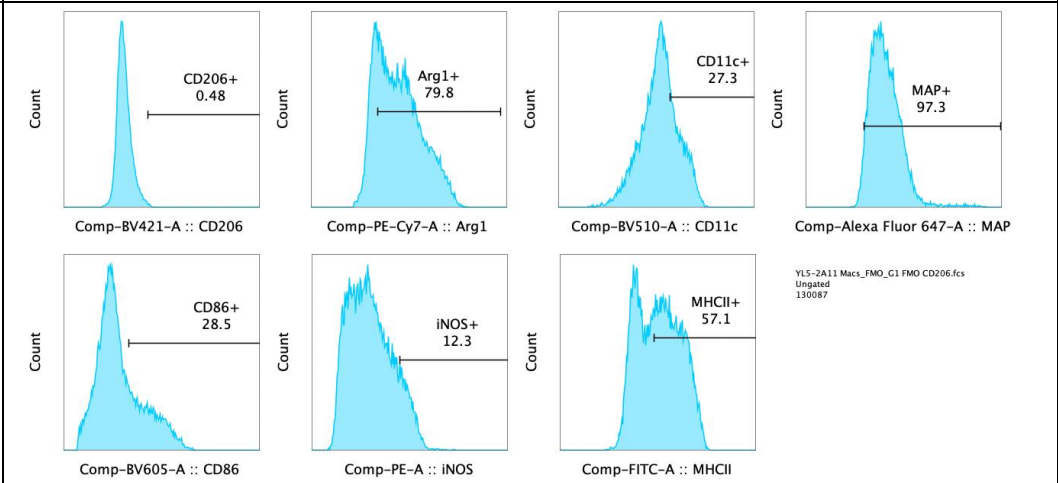

FMO-Arg1  
(Gated on macrophage population)

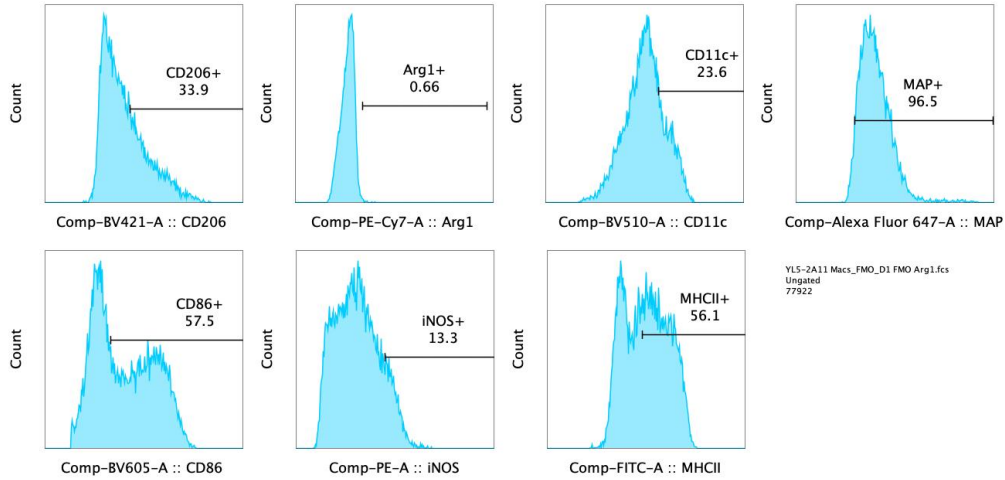

FMO-MAP AF647  
(Gated on macrophage population, using L-MAPS implant without AF647 labeling)

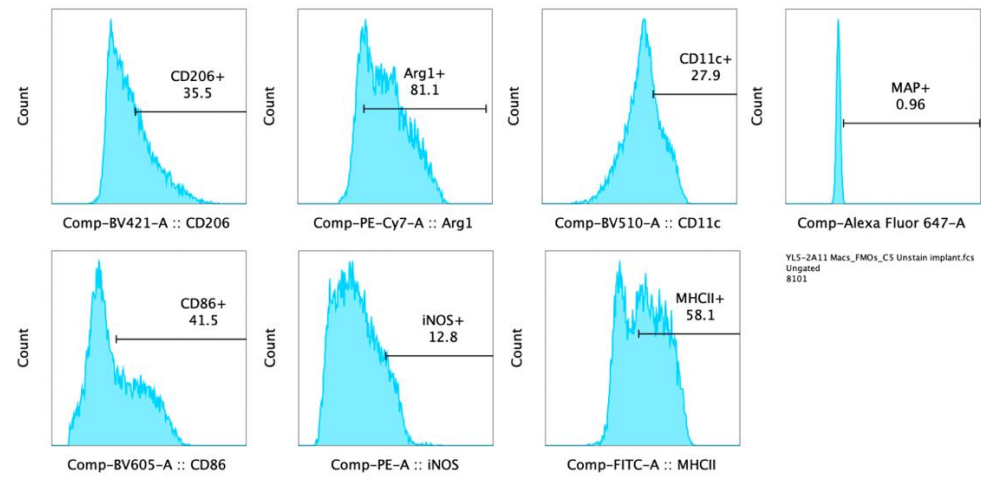

Table S12. Fluorescence minus one (FMO) controls for the B cell panel

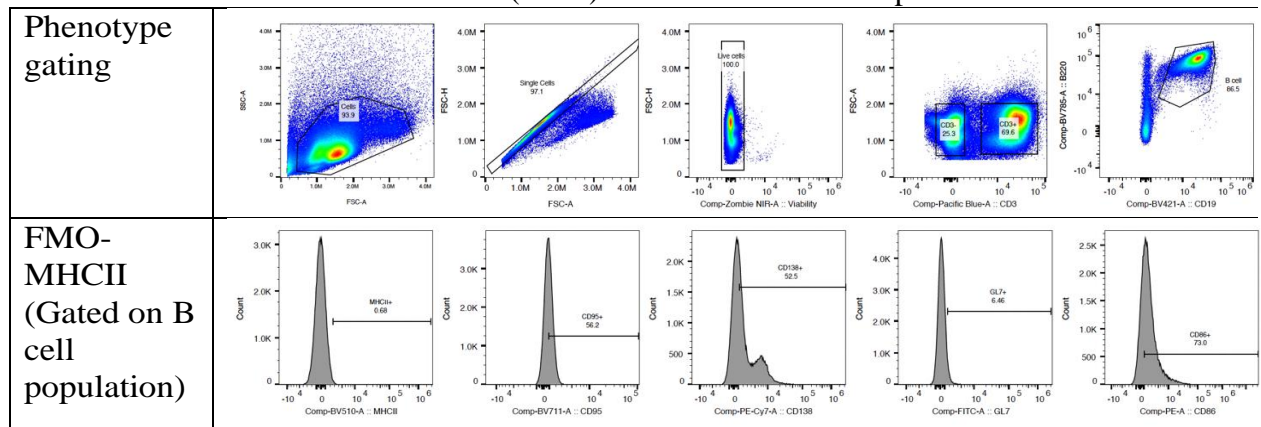

**FMO-Tbet**

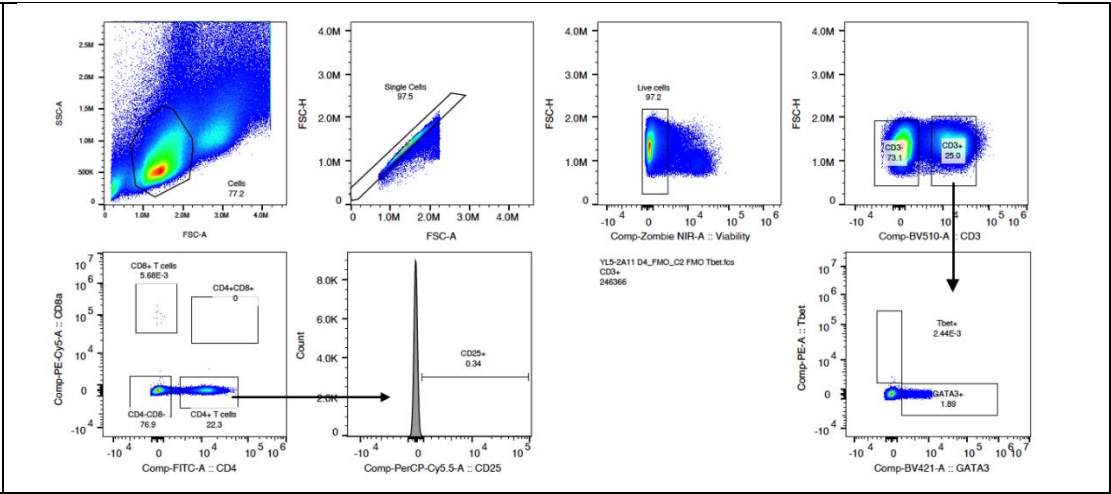

**FMO-CD95  
(Gated on B cell population)**

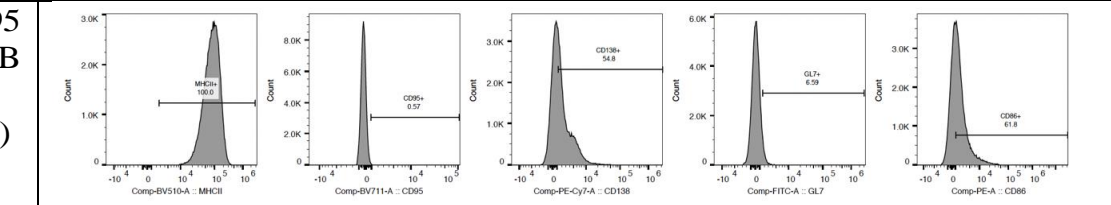

**FMO-CD138  
(Gated on B cell population)**

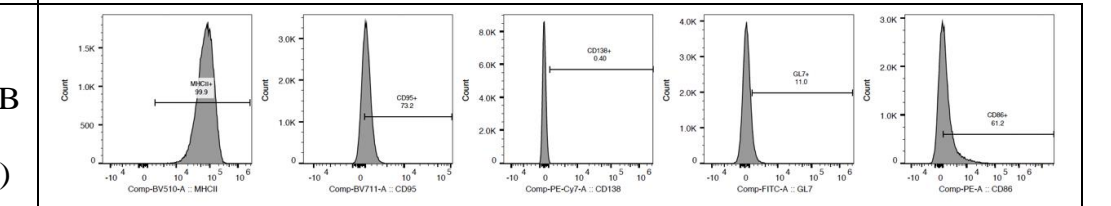

**FMO-GL7  
(Gated on B cell population)**

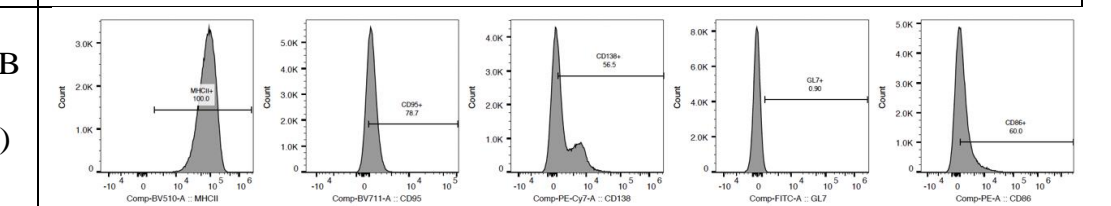

**FMO-CD86  
(Gated on B cell population)**

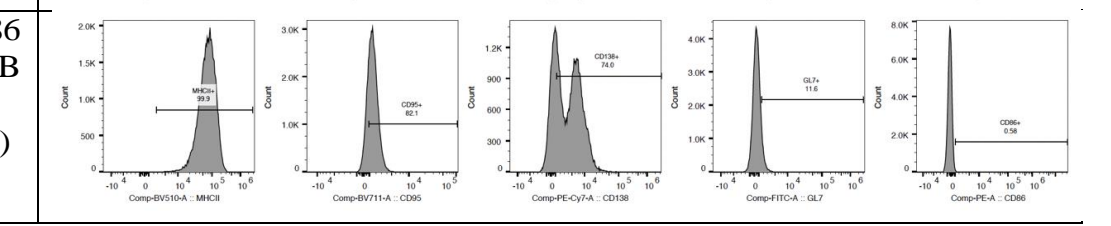



**FMO-GATA3**

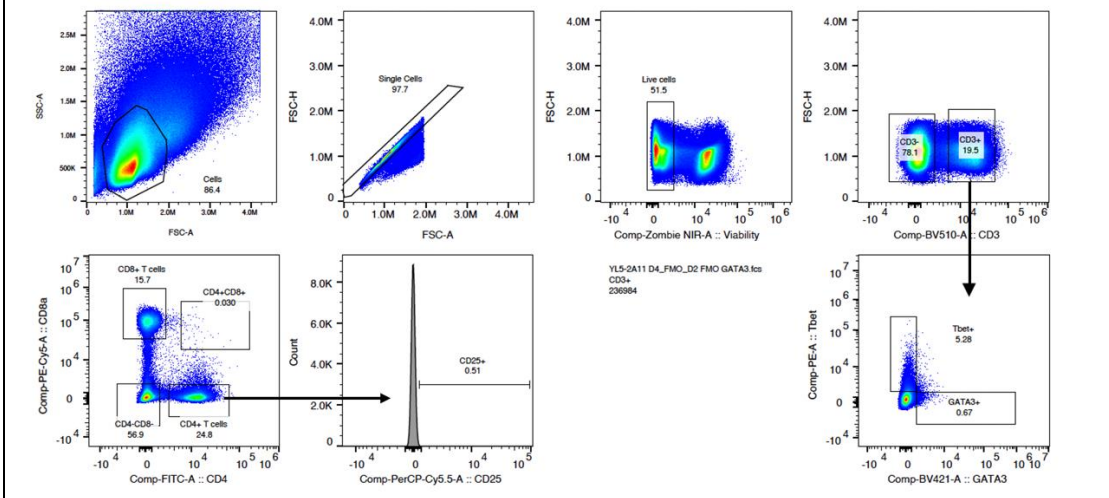

**FMO-CD25**

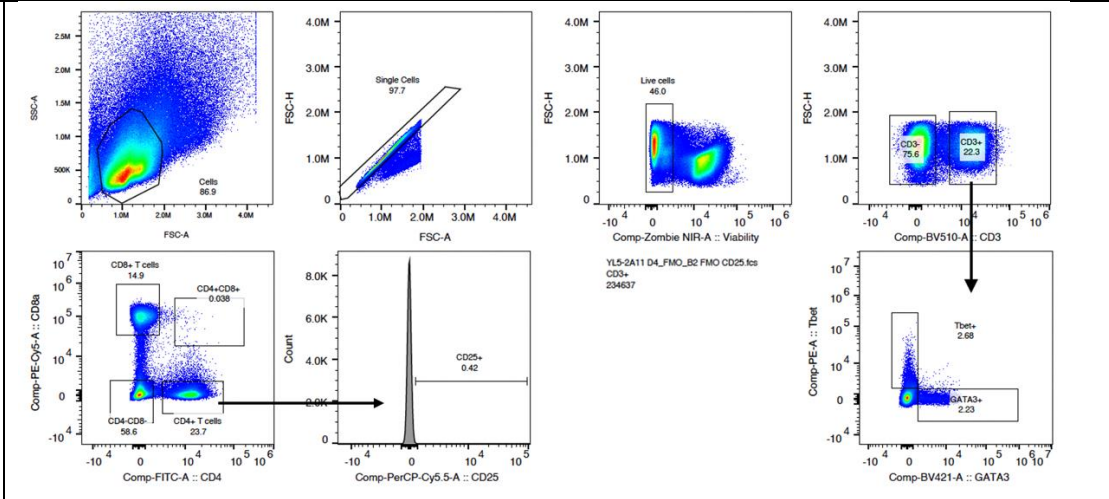

**Table S13.** Fluorescence minus one (FMO) controls for the T cell panel
